# Supplementary material for: Growth and inhibition of monohydrate sodium urate banded spherulites
Source: Royal Society of Chemistry journal article supplement (doi:10.1039/d0ce01378a), 2020-12-22
Supplement: d0ce01378a1.pdf [file d0ce01378a1.pdf]

## Supporting Information

### **Growth and inhibition of monohydrate sodium urate banded spherulites**

Yao Zhou, † Xiaowei Feng, † Ting Wang‡, Yang Tian† and Xiaoyan Cui\*†

#### AUTHOR ADDRESS

† Y. Zhou, X. Feng, Yang Tian, Prof. Dr. X. Cui,

Department of Chemistry, School of Chemistry and Molecular Engineering, East China

Normal University, Shanghai, 200241, P.R. China

E-mail: xycui@chem.ecnu.edu.cn

‡ Prof. Dr. T. Wang

College of Pharmacy, Second Military Medical University, Shanghai, 200433, P.R. China.

## Table of Contents

**Figure S1** Packing diagram of MSU crystal viewed along different directions

**Figure S2** The X-ray diffraction pattern of MSU

**Figure S3** Raman spectra of MSU banded spherulite

**Figure S4** Optical images of MSU spherulites with additives at different concentration

**Figure S5.** SEM images of MSU spherulites at differ conditions

**Figure S6** Configurations of adsorbed DMUA and MUA on flat surfaces with solvent

**Figure S7** Configurations of adsorbed xanthine on flat surfaces

**Table S1.** Adsorption Energies to the flat (100), (010) and (001) MSU faces in the existence of solvent

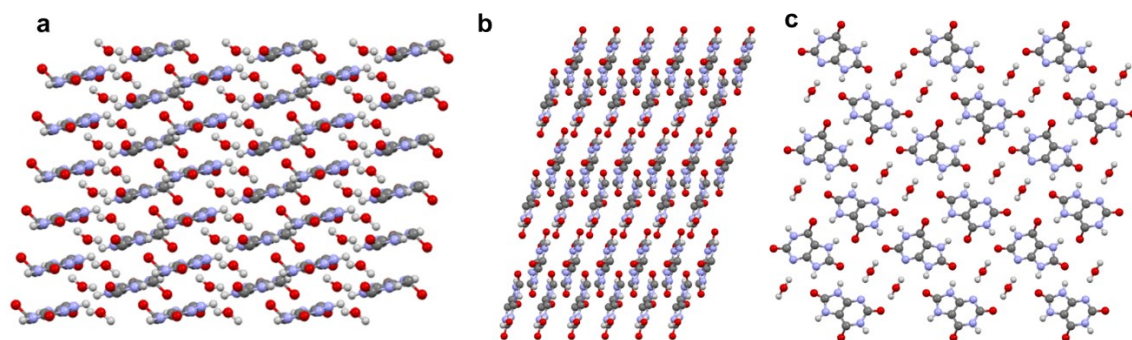

**Figure S1.** Packing diagram of MSU viewed along *a* axis (a), *b* axis (b), *c* axis (c)

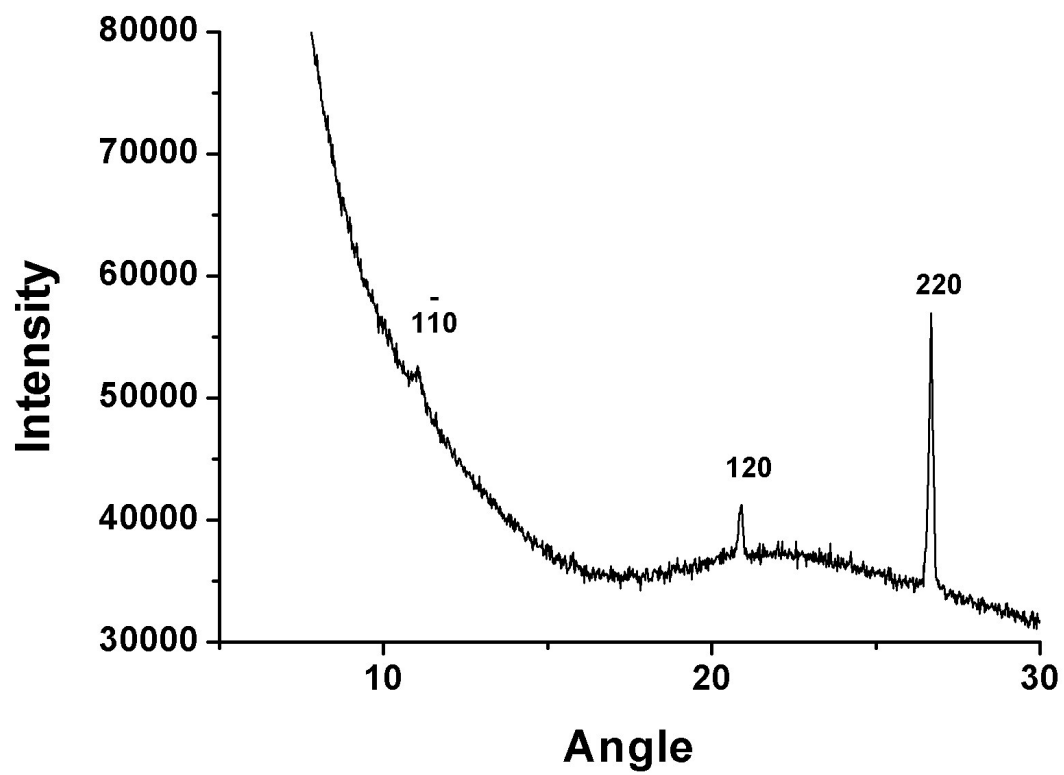

Figure S2. X-ray diffraction pattern of MSU spherulites.

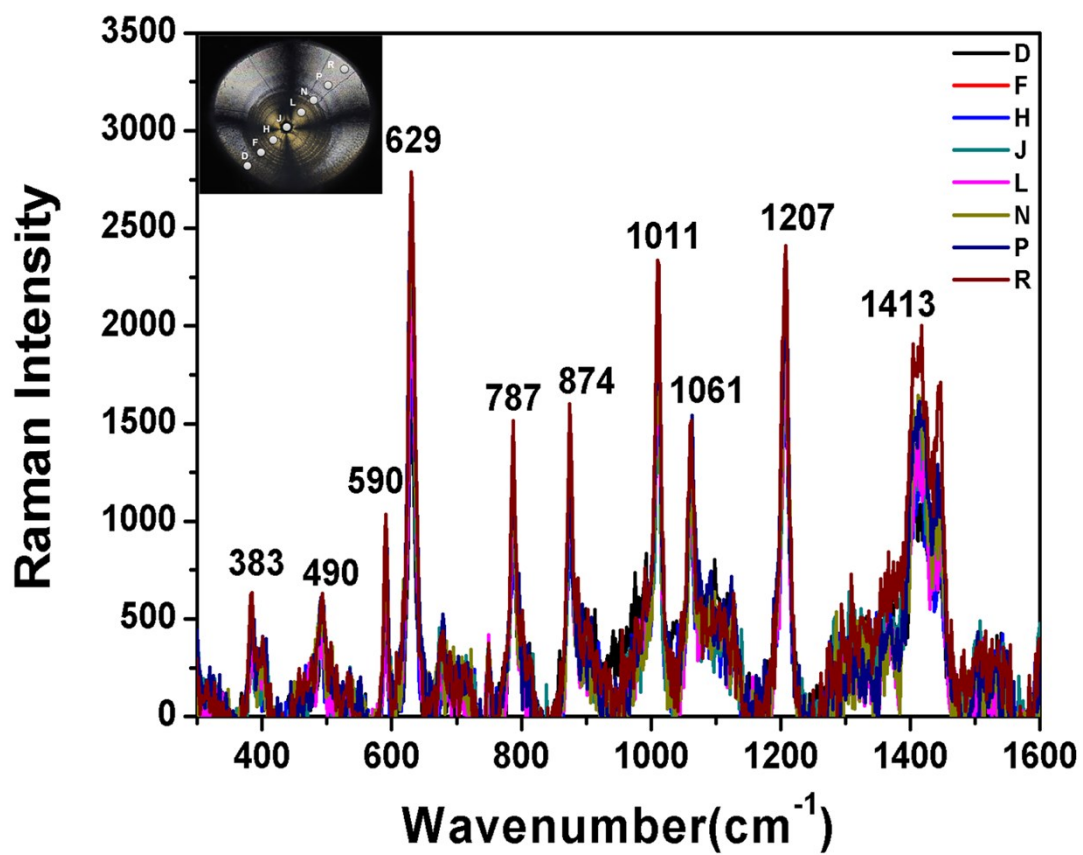

Figure S3. Raman spectra of banded spherulite measured along the radial direction of the insert optical pictures.

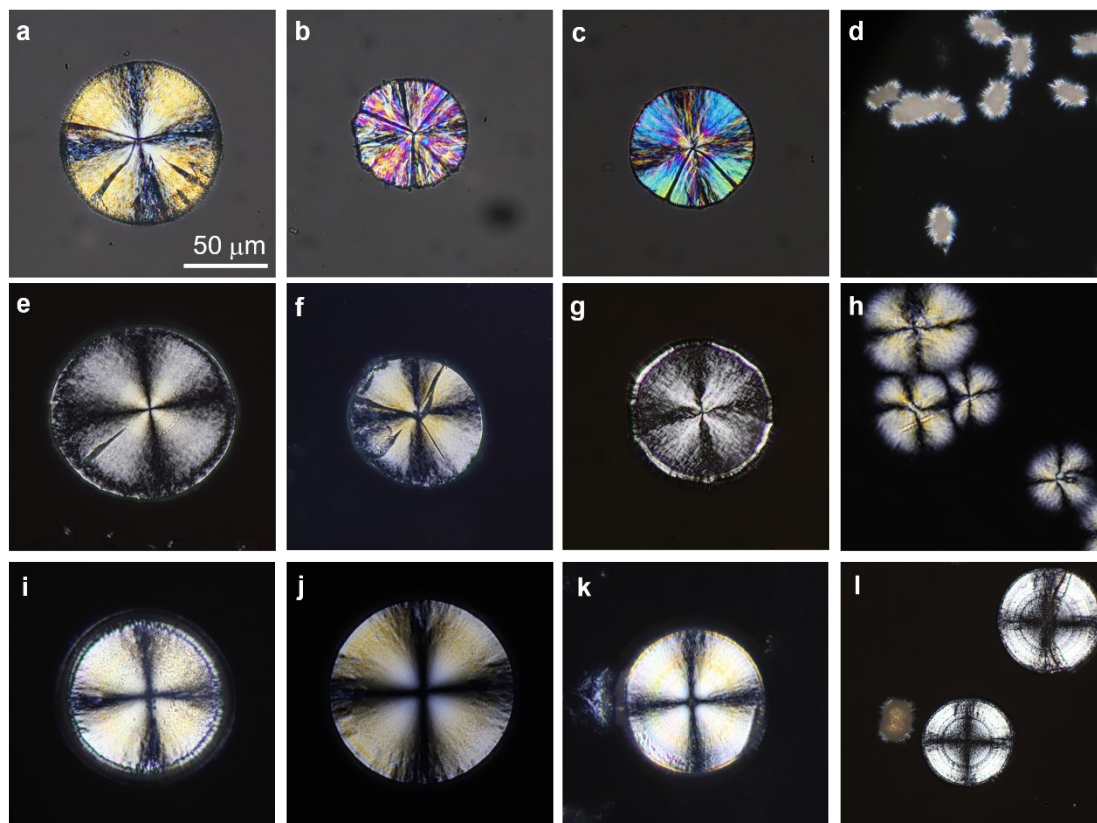

**Figure S4.** The optical images of banded MSU spherulites with DMUA (a-d), MUA (e-h) and xanthine(i-l) of varied concentrations (a, e, i) 1.0 mM, (b, f, j) 3.0 mM, (c, g, k) 5.0 mM and (d, h, l) 7.0 mM, respectively.

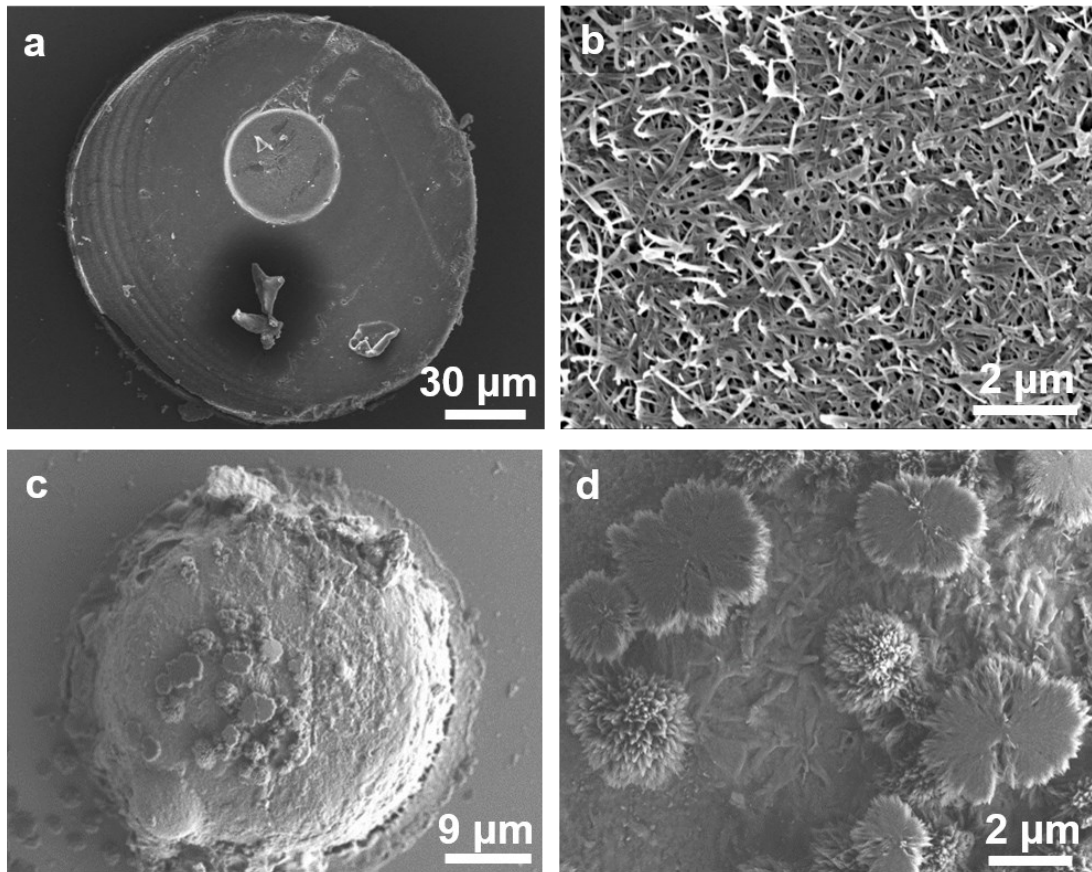

**Figure S5.** SEM images of MSU spherulites without tailor-made additives (a, b), with xanthine level at 3.0 mM (c, d).



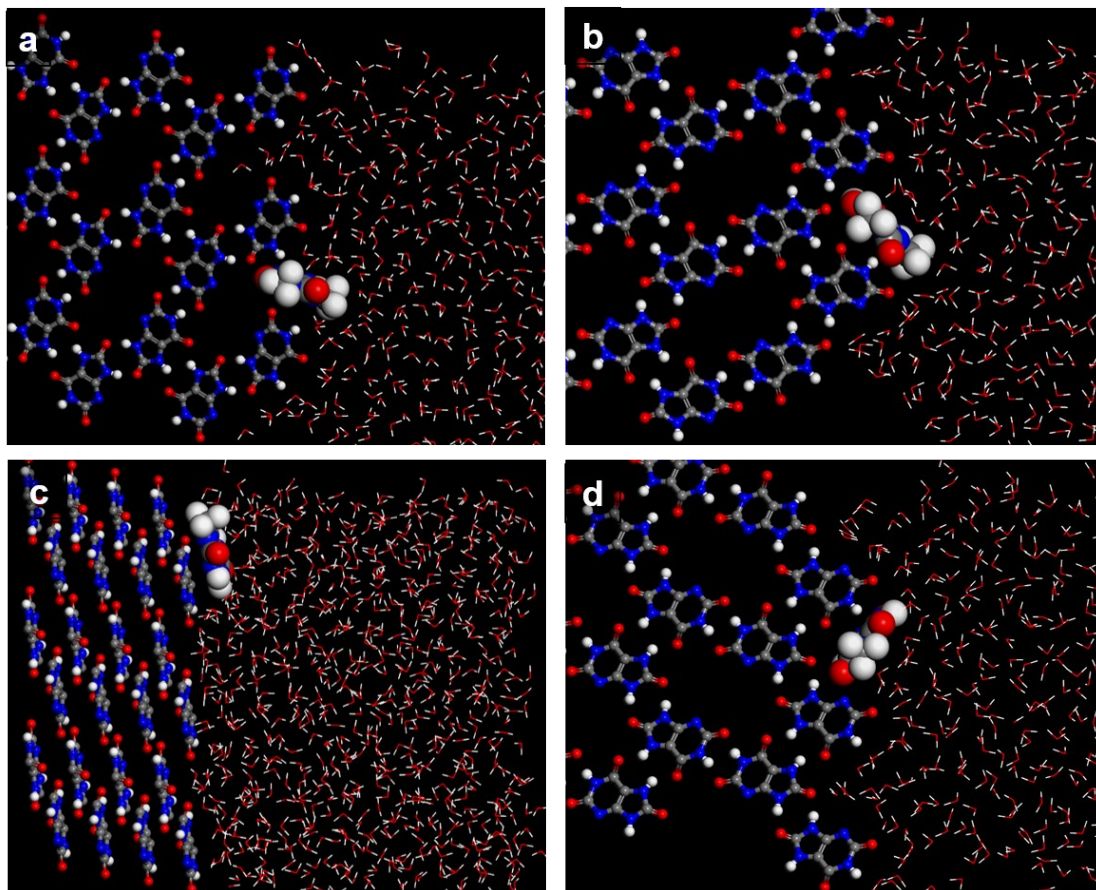

**Figure S6.** Configurations of the DMUA (a, b) adsorbed onto (010), (100) faces, MUA (c, d) adsorbed onto (001), (100) faces of MSU crystal (in ball-and-stick presentation) in the existence of solvent (H<sub>2</sub>O, in line presentation).



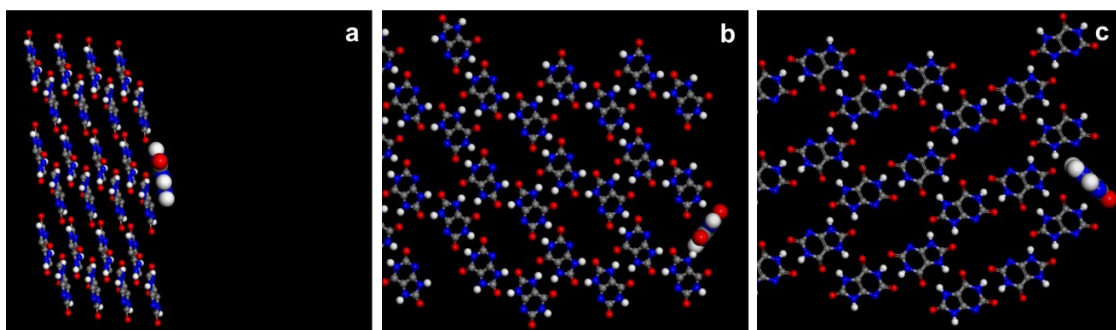

**Figure S7.** Configurations of xanthine when absorbed onto the (001), (010), (100) facets of MSU crystal (in ball-and-stick presentation).

**Table S1. Adsorption Energies to the flat (100), (010) and (001) MSU faces in the existence of solvent**

| Surfaces<br>Adsorbates | Absolutes (kcal/mol) |       |       |
|------------------------|----------------------|-------|-------|
|                        | (100)                | (010) | (001) |
| DMUA                   | -36.5                | -24.7 | -47.2 |
| MUA                    | -31.9                | -19.5 | -26.6 |
